# Supplementary material for: Untargeted Metabolomic Characterization of Ovarian Tumors
Source: PubMed Central journal article supplement (PMC7761955; doi:10.3390/cancers12123642), 2020-12-04
Supplement: cancers-12-03642-s001.pdf [file cancers-12-03642-s001.pdf]

# Untargeted Metabolomic Characterization of Ovarian Tumors

Xiaona Liu, Gang Liu, Lihua Chen, Fei Liu, Xiaozhe Zhang, Dan Liu, Xinxin Liu, Xi Cheng and Lei Liu

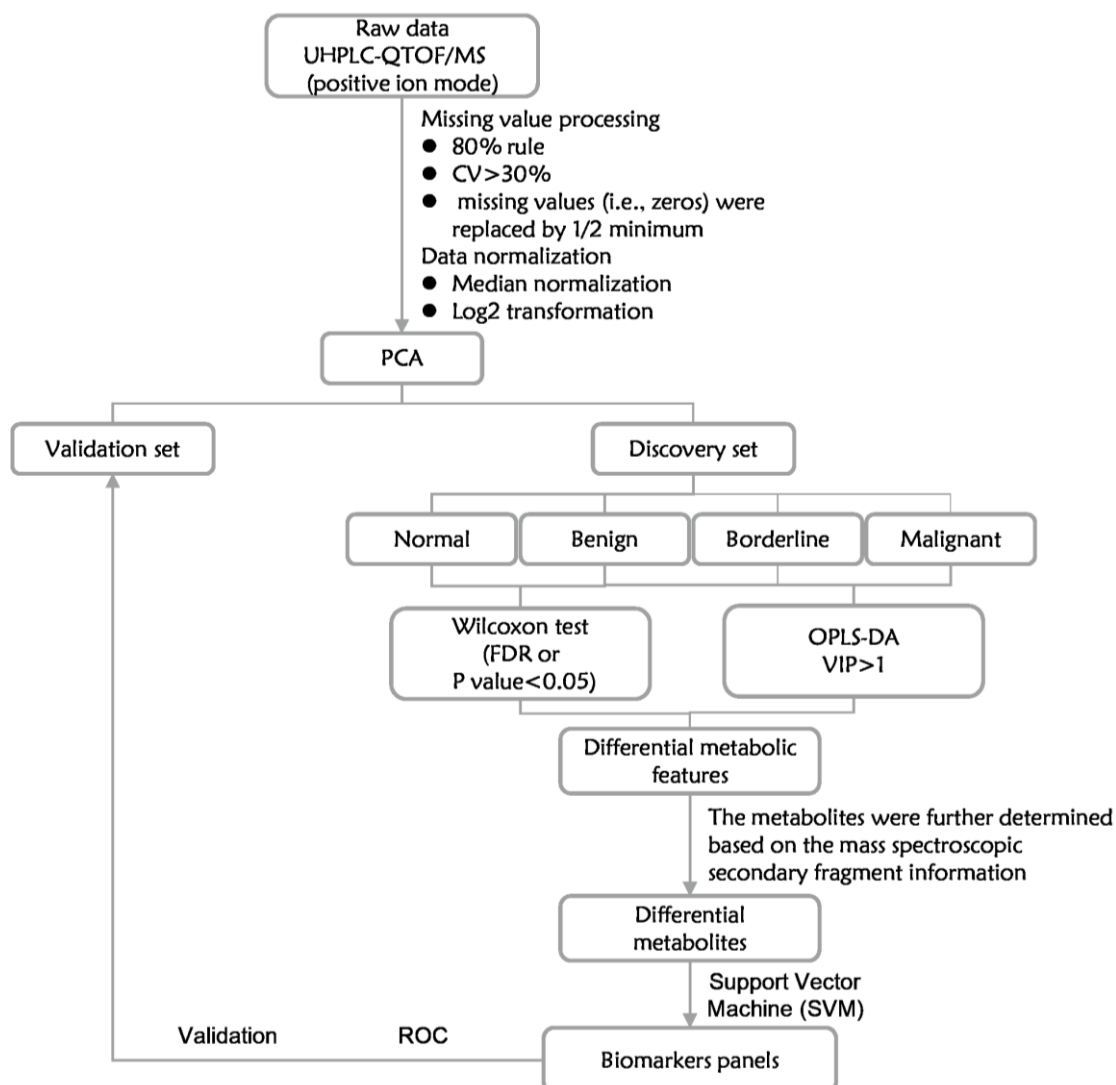

**Figure S1.** Technique pipeline to identifying potentially biomarkers panels in three comparison groups.

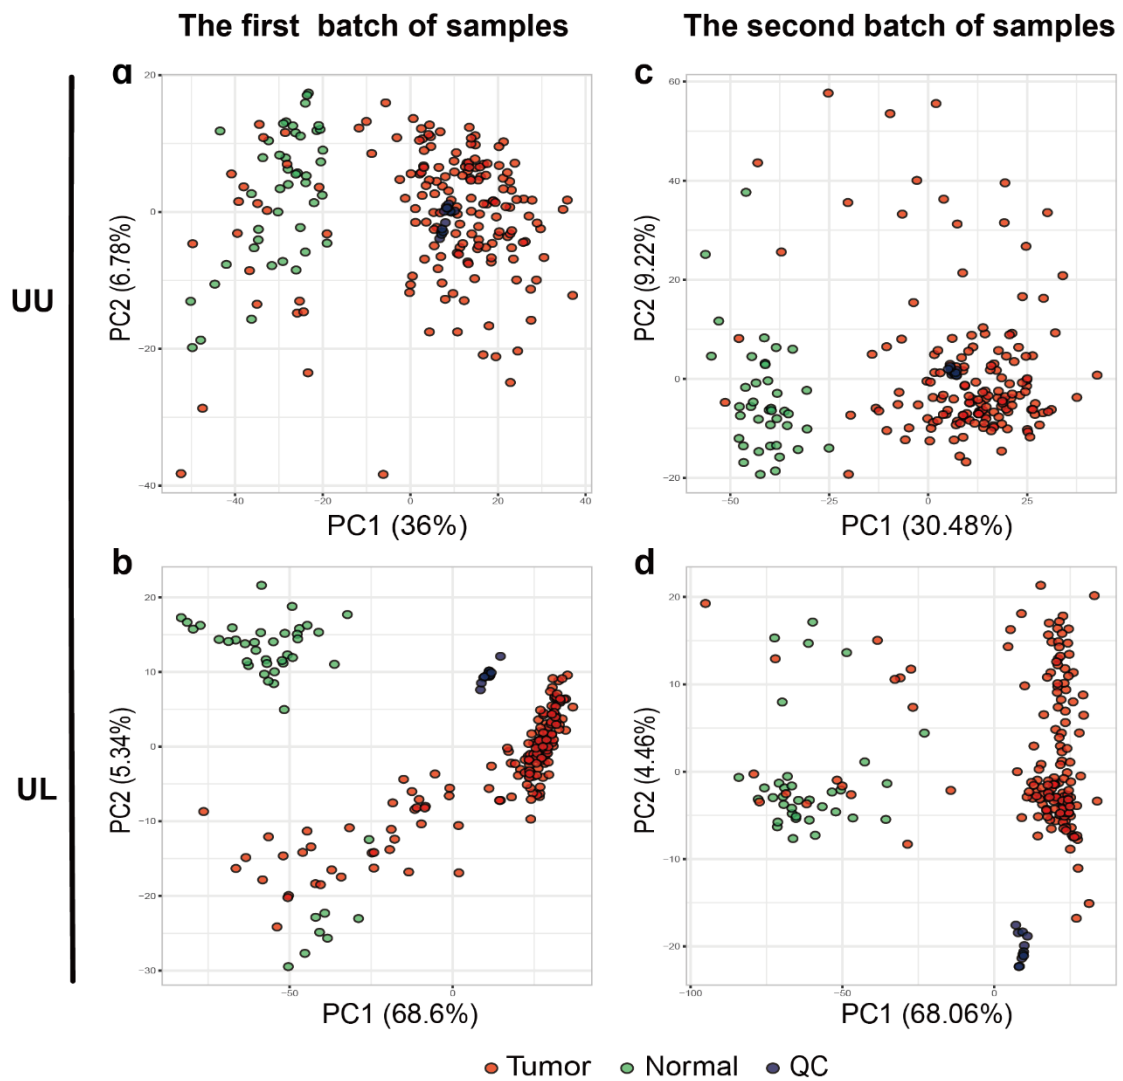

**Figure S2.** Score plots of PCA from the two batch of urine samples. (a, b) PCA score plots of UU, and UL from the first batch of urine samples. (c, d) PCA score plots of UU, and UL from the second batch of urine samples. UU, urine polar sample; UL, urine nonpolar sample. Red plots indicate ovarian tumors. Green plots indicate normal controls. Blue plots indicate quality control samples.

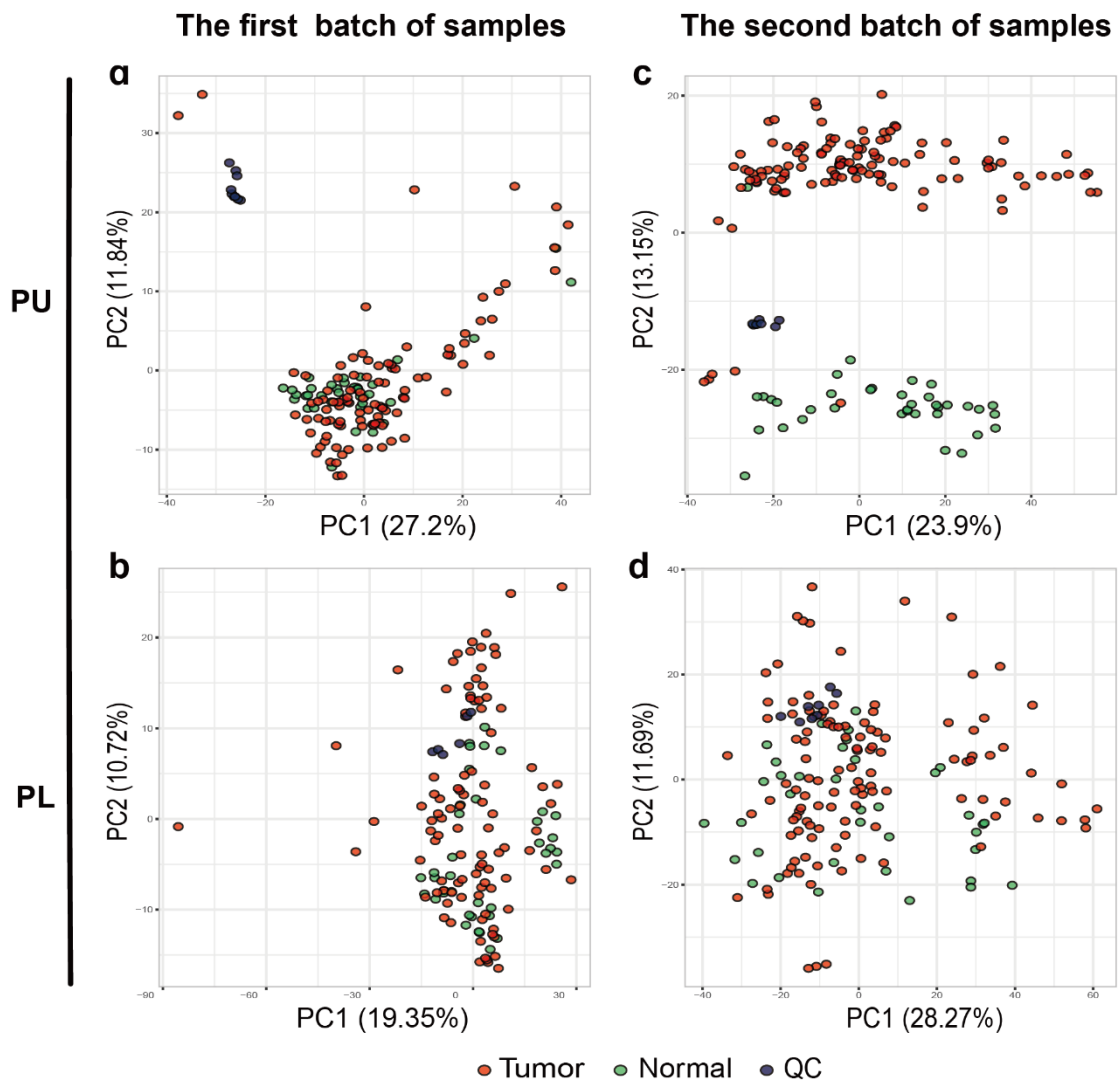

**Figure S3.** Score plots of PCA from the two batch of plasma samples. **(a, b)** PCA score plots of PU, and PL from the first batch of plasma samples. **(c, d)** PCA score plots of PU, and PL from the second batch of plasma samples. PU, plasma polar sample; PL, plasma nonpolar sample. Red plots indicate ovarian tumors. Green plots indicate normal controls. Blue plots indicate quality control samples.

## Urine

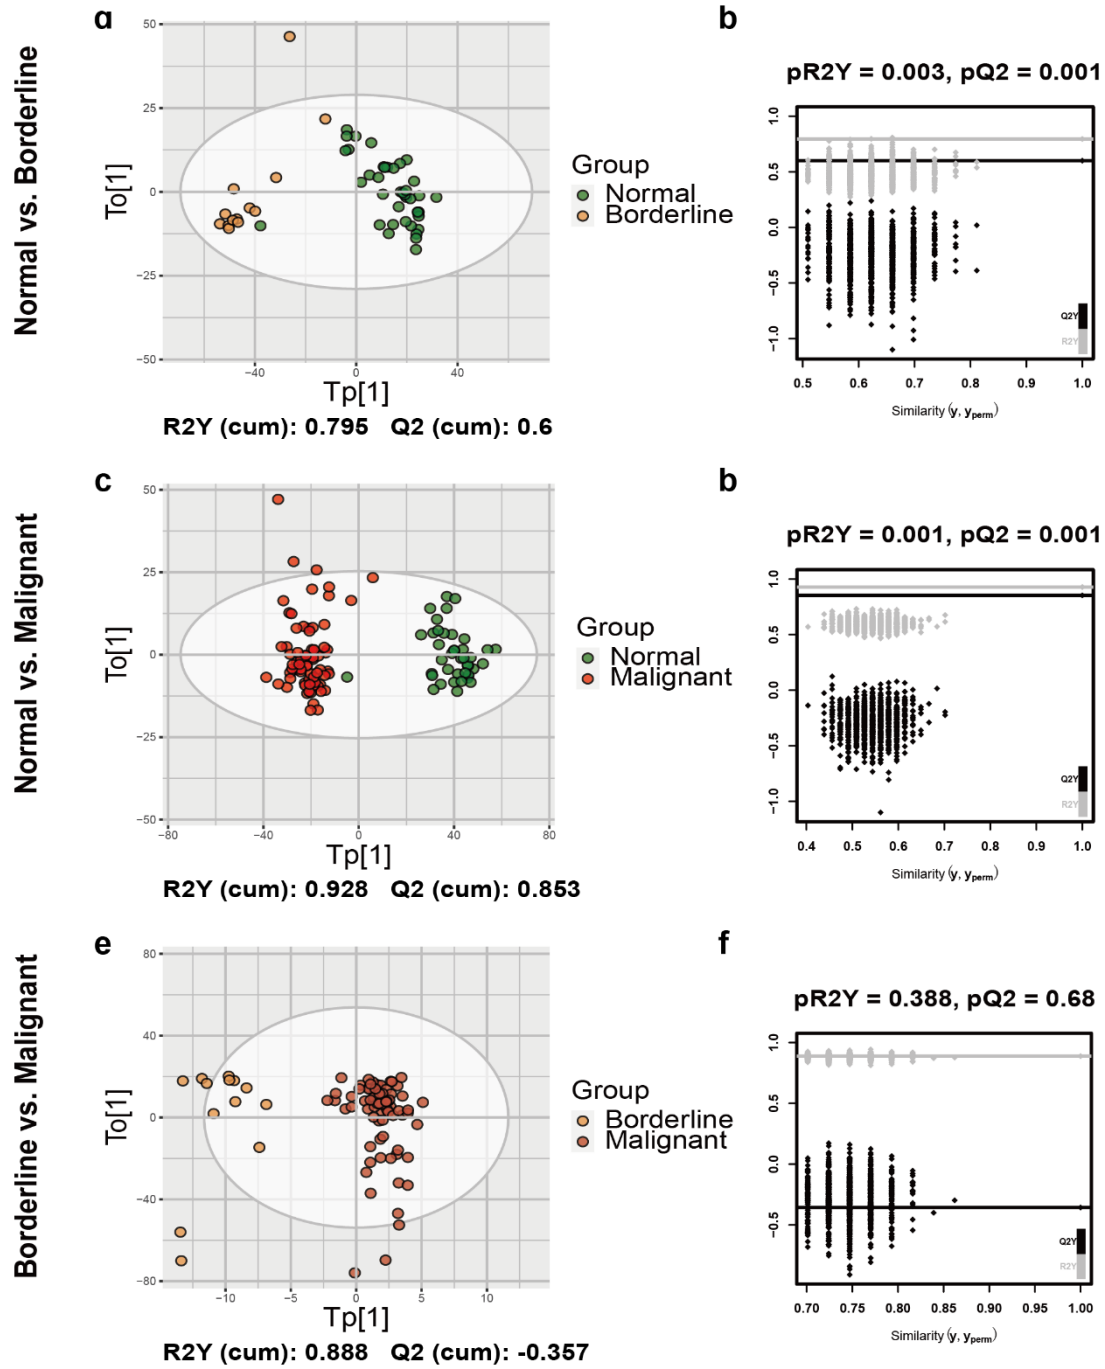

**Figure S4.** The OPLS-DA score plot and the permutation test results of urine samples. The OPLS-DA score plot between (a) normal controls and borderline, (c) normal with malignant, (e) borderline and malignant ovarian tumors in urine samples, and the corresponding permutation test results (b), (d), (f).

Plasma

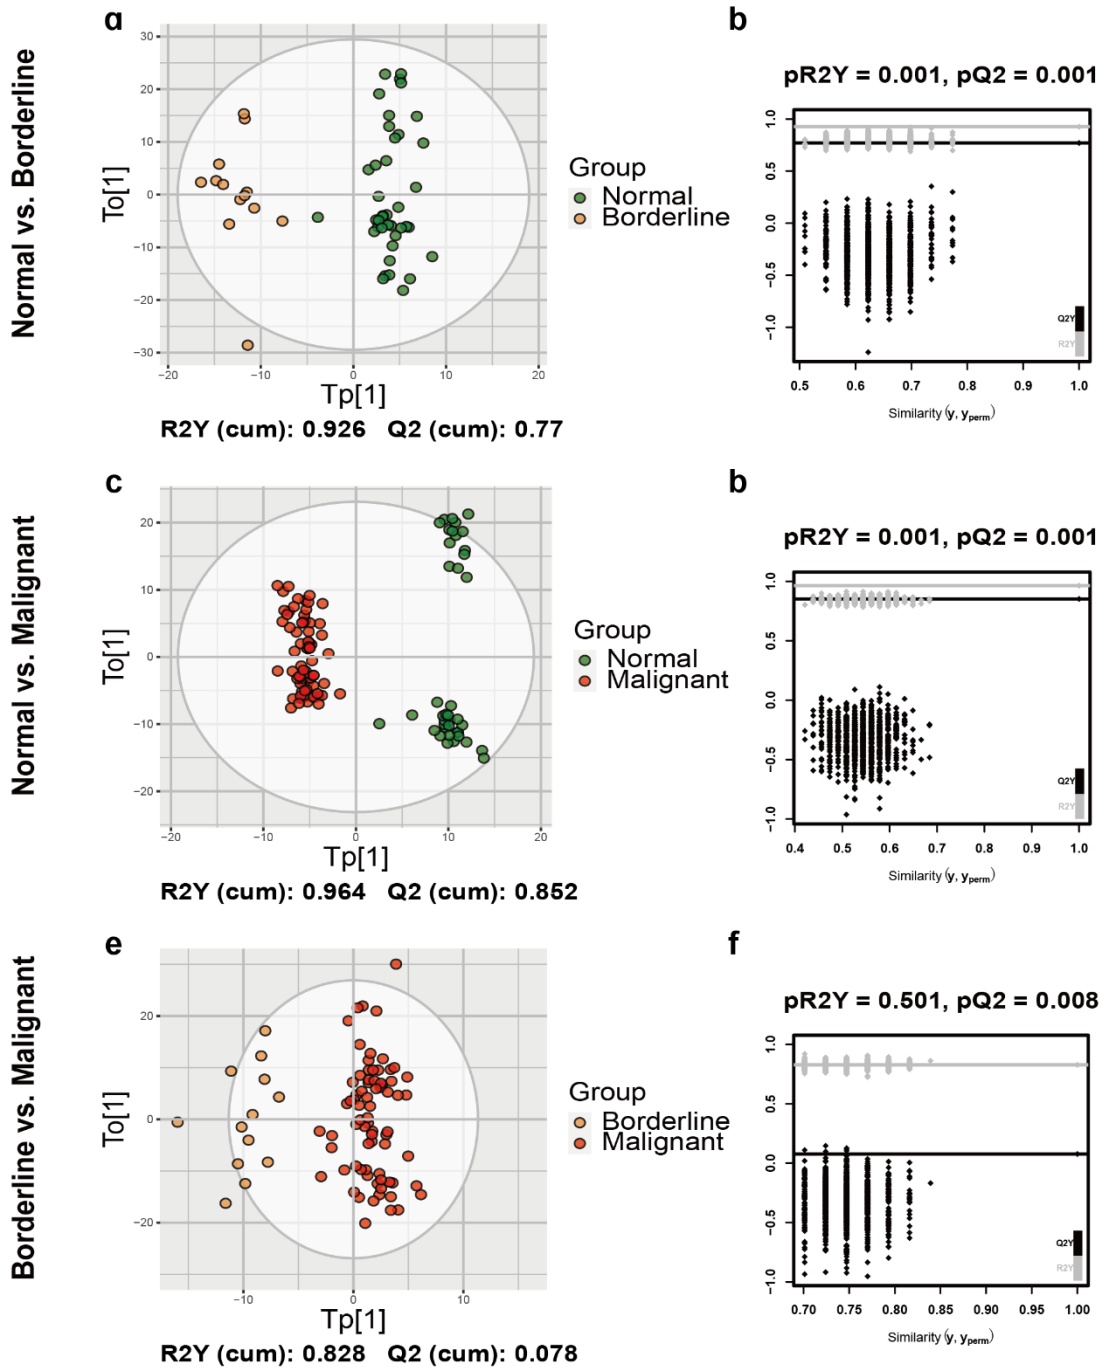

**Figure S5.** The OPLS-DA score plot and the permutation test results of plasma samples. The OPLS-DA score plot between (a) normal controls and borderline, (c) normal and malignant, (e) borderline and malignant ovarian tumors in plasma samples, and the corresponding permutation test results (b), (d), (f).

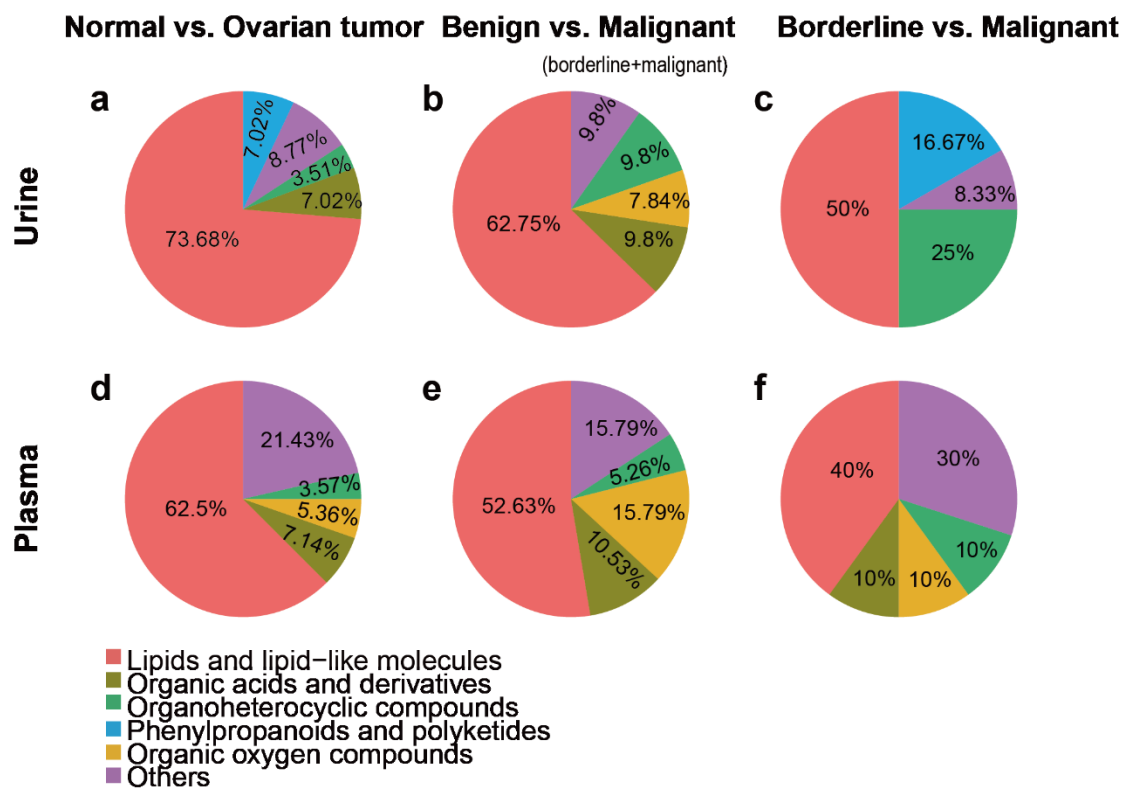

**Figure S6.** Compound category of differential metabolites. Compound category of differential metabolites in urine between (a) normal controls and ovarian tumors, (b) benign and malignant (borderline+malignant), and (c) borderline and malignant ovarian tumors. Compound category of differential metabolites in plasma between (d) normal controls and ovarian tumors, (e) benign and malignant (borderline+malignant), and (f) borderline and malignant ovarian tumors.

### 5-Meta+CA125

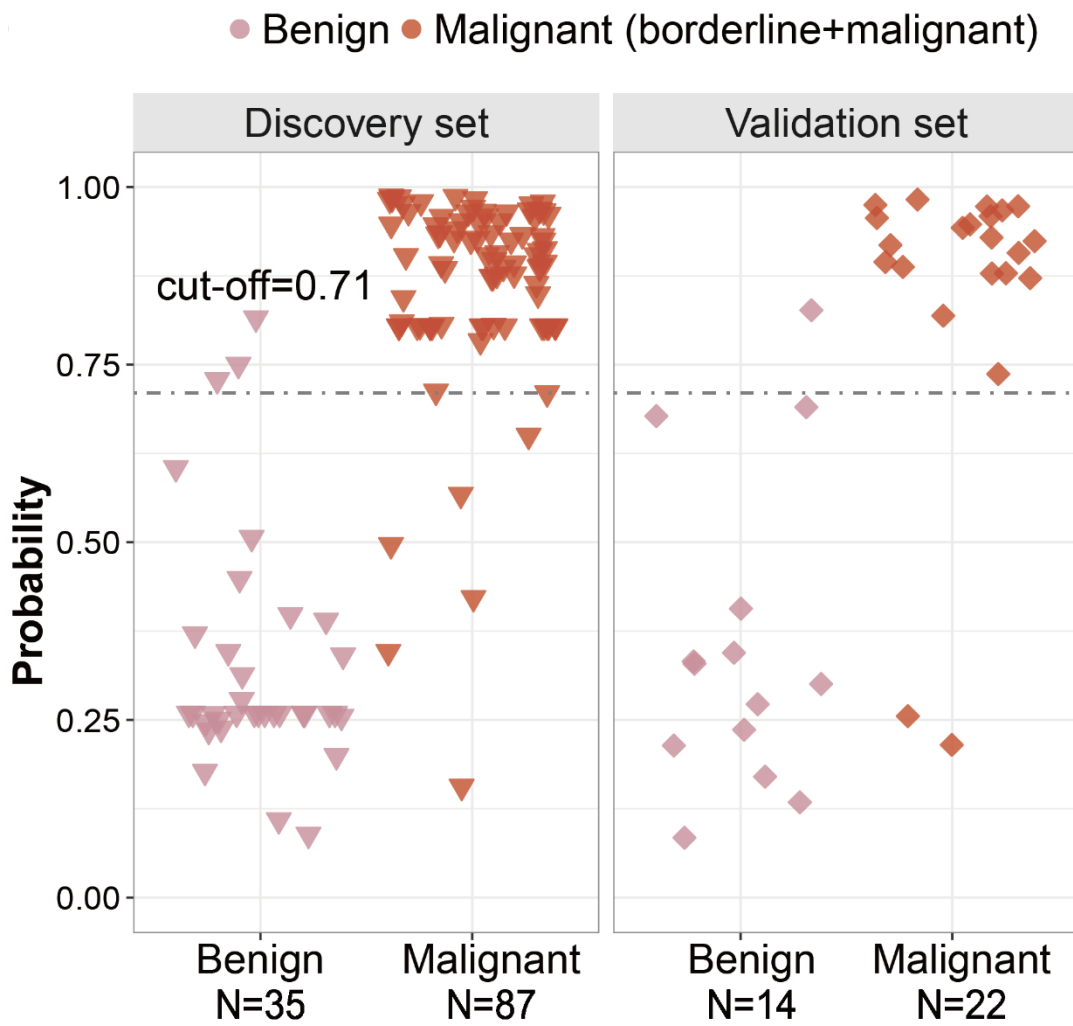

**Figure S7.** Prediction plot of the hybrid model for distinguishing benign and malignant (borderline+malignant) ovarian tumors. The prediction performance by the hybrid based on 5 plasma metabolites and CA125 for diagnosing malignant (borderline+malignant) ovarian tumors from benign ovarian tumors in the discovery and validation set.

**Table S1.** Other clinical characteristics of the samples in each set.

| level                              | Discovery set    |                   |                   |                   | Validation set  |                  |            |                   |                 |                   |                    |                   |
|------------------------------------|------------------|-------------------|-------------------|-------------------|-----------------|------------------|------------|-------------------|-----------------|-------------------|--------------------|-------------------|
|                                    | Plasma/Urine     |                   |                   |                   | Plasma          |                  |            |                   | Urine           |                   |                    |                   |
|                                    | Normal           | Benignant         | Borderline        | Malignant         | Normal          | Benignant        | Borderline | Malignant         | Normal          | Benignant         | Borderline         | Malignant         |
| <b>n</b>                           | 40               | 36                | 13                | 74                | 36              | 14               | 1          | 21                | 40              | 45                | 7                  | 76                |
| <b>CA199</b><br><b>(mean (sd))</b> | 16.89<br>(10.60) | 52.12<br>(169.76) | 65.96<br>(132.63) | 74.35<br>(218.29) | 15.18<br>(9.08) | 25.64<br>(37.42) | 10.08      | 49.41<br>(102.10) | 15.01<br>(8.57) | 68.48<br>(143.49) | 113.47<br>(151.48) | 45.89<br>(128.19) |
| <b>AFP</b><br><b>(mean (sd))</b>   | 4.12<br>(1.54)   | 2.63<br>(1.35)    | 3.09<br>(1.27)    | 55.15<br>(433.60) | 3.69<br>(0.97)  | 2.56<br>(1.34)   | 1.16       | 22.97<br>(74.33)  | 3.65<br>(1.20)  | 2.65<br>(1.26)    | 3.55<br>(2.24)     | 3.77<br>(5.70)    |
| <b>CEA</b><br><b>(mean (sd))</b>   | 1.73<br>(0.53)   | 1.30<br>(0.70)    | 1.89<br>(1.46)    | 4.60<br>(12.55)   | 1.77<br>(0.49)  | 1.39<br>(0.81)   | 0.19       | 9.69<br>(26.79)   | 1.76<br>(0.59)  | 1.46<br>(0.88)    | 1.88<br>(1.20)     | 6.49<br>(30.05)   |
| <b>SCCA</b><br><b>(mean (sd))</b>  | 0.68<br>(0.55)   | 0.76<br>(0.28)    | 0.68<br>(0.26)    | 1.39<br>(3.83)    | 0.66<br>(0.29)  | 0.84<br>(0.23)   | 0.3        | 0.65<br>(0.36)    | 0.61<br>(0.30)  | 0.80<br>(0.43)    | 0.78<br>(0.30)     | 0.77<br>(0.58)    |
| <b>NSE</b><br><b>(mean (sd))</b>   | 5.88<br>(2.16)   | 10.37<br>(2.27)   | 12.11<br>(1.93)   | 20.68<br>(15.26)  | 4.73<br>(1.05)  | 10.25<br>(2.09)  | 11.75      | 15.80<br>(6.13)   | 5.28<br>(1.38)  | 10.49<br>(2.29)   | 9.94<br>(0.67)     | 17.70<br>(9.31)   |

**Table S2.** Statistical analysis of differential urine metabolites from three group of comparison.

| Metabolites                                                 | RT<br>(min) | m/z      | Delta<br>(ppm) | P-value                | FDR                    | log2FC  | VIP    |
|-------------------------------------------------------------|-------------|----------|----------------|------------------------|------------------------|---------|--------|
| <b>Normal vs. Ovarian tumor</b>                             |             |          |                |                        |                        |         |        |
| 2,2,6,7-Tetramethylbicyclo[4.3.0]nona-1(9),4-diene-7,8-diol | 2.4702      | 226.1787 | -18.25         | $7.21 \times 10^{-14}$ | $1.33 \times 10^{-13}$ | -1.7684 | 1.0488 |
| HMDB0126628                                                 | 2.9224      | 576.1293 | 1.75           | $1.19 \times 10^{-19}$ | $4.99 \times 10^{-19}$ | -2.4636 | 1.2012 |
| Feruloylcholine                                             | 4.6002      | 298.1857 | -9.69          | $1.37 \times 10^{-12}$ | $2.34 \times 10^{-12}$ | 2.4574  | 1.0582 |
| 9'-Carboxy-gamma-tocotrienol                                | 3.5418      | 391.2703 | -4.21          | $1.10 \times 10^{-13}$ | $2.01 \times 10^{-13}$ | -2.1683 | 1.0421 |
| 6-Keto-prostaglandin F1a                                    | 4.0455      | 409.1832 | -18.84         | $4.50 \times 10^{-14}$ | $8.45 \times 10^{-14}$ | 1.6085  | 1.0877 |
| Austalide L                                                 | 4.5637      | 448.2644 | 2.88           | $1.14 \times 10^{-14}$ | $2.26 \times 10^{-14}$ | 2.2649  | 1.0739 |
| Capsoside A                                                 | 6.2219      | 717.3676 | -0.06          | $5.17 \times 10^{-15}$ | $1.06 \times 10^{-14}$ | 2.5178  | 1.0142 |
| Quinine                                                     | 5.1454      | 325.1856 | -14.12         | $1.77 \times 10^{-15}$ | $3.76 \times 10^{-15}$ | 2.6304  | 1.2532 |
| Ginsenyone C                                                | 4.9177      | 277.1789 | 1.26           | $6.42 \times 10^{-16}$ | $1.42 \times 10^{-15}$ | -1.5775 | 1.0796 |
| Porphobilinogen                                             | 4.4608      | 227.6054 | 1.32           | $4.48 \times 10^{-16}$ | $1.01 \times 10^{-15}$ | 2.1794  | 1.1076 |
| Ursolic acid                                                | 7.3843      | 495.3321 | 14.06          | $4.75 \times 10^{-17}$ | $1.21 \times 10^{-16}$ | -1.6310 | 1.0472 |
| 3-Oxochoolic acid                                           | 7.281       | 407.2759 | 4.85           | $4.52 \times 10^{-17}$ | $1.15 \times 10^{-16}$ | -1.5103 | 1.0353 |
| PE(36:4)                                                    | 5.5261      | 722.5014 | -8.56          | $3.55 \times 10^{-17}$ | $9.13 \times 10^{-17}$ | -3.8321 | 1.3991 |
| Thromboxane                                                 | 5.0003      | 316.3472 | 0.95           | $3.07 \times 10^{-17}$ | $8.01 \times 10^{-17}$ | -1.5745 | 1.0652 |
| (Z)-8-Tetradecenal                                          | 5.3471      | 228.2314 | 10.53          | $2.92 \times 10^{-17}$ | $7.68 \times 10^{-17}$ | -1.3385 | 1.0096 |
| Behenic acid                                                | 4.9745      | 358.3667 | 0.59           | $2.78 \times 10^{-17}$ | $7.32 \times 10^{-17}$ | -1.3734 | 1.0363 |
| Farnesol                                                    | 9.1546      | 240.2321 | 0.93           | $2.17 \times 10^{-17}$ | $5.79 \times 10^{-17}$ | -1.5129 | 1.0080 |
| beta-Elemonic acid                                          | 7.8083      | 477.3189 | -27.98         | $1.97 \times 10^{-17}$ | $5.29 \times 10^{-17}$ | -1.4318 | 1.0059 |
| Dihydrocumambrin A                                          | 4.6367      | 347.1247 | 0.36           | $1.78 \times 10^{-17}$ | $4.87 \times 10^{-17}$ | -1.6317 | 1.0522 |
| (Z)-3-Dodecene                                              | 3.2438      | 186.2208 | 0.81           | $1.46 \times 10^{-17}$ | $4.05 \times 10^{-17}$ | -1.4175 | 1.0762 |
| DAG(18:0)                                                   | 5.2985      | 395.2757 | 1.83           | $1.08 \times 10^{-17}$ | $3.06 \times 10^{-17}$ | -1.4892 | 1.0204 |
| Pubescenol                                                  | 7.1438      | 475.2956 | -10.33         | $7.59 \times 10^{-18}$ | $2.21 \times 10^{-17}$ | -1.5887 | 1.0640 |
| Geranylacetone                                              | 9.1587      | 212.2008 | 6.52           | $5.88 \times 10^{-18}$ | $1.74 \times 10^{-17}$ | -1.4734 | 1.0024 |
| 13'-Carboxy-gamma-tocopherol                                | 6.0073      | 429.317  | -22.08         | $3.89 \times 10^{-18}$ | $1.19 \times 10^{-17}$ | -2.3616 | 1.2038 |
| (ent-16alpha)-16-Kauranol                                   | 7.0928      | 308.2937 | 0.06           | $3.89 \times 10^{-18}$ | $1.19 \times 10^{-17}$ | -1.6052 | 1.0410 |
| LPA(13:0)                                                   | 5.6308      | 407.1677 | 22.05          | $1.51 \times 10^{-18}$ | $5.04 \times 10^{-18}$ | 2.7261  | 1.2605 |
| Poly sorbate 60                                             | 4.3144      | 474.2543 | 1.24           | $1.22 \times 10^{-18}$ | $4.11 \times 10^{-18}$ | -1.7537 | 1.0325 |
| PG(42:9)                                                    | 6.4607      | 423.7773 | 11.28          | $1.22 \times 10^{-18}$ | $4.11 \times 10^{-18}$ | 2.5956  | 1.0377 |
| Geranylcitronellol                                          | 7.9792      | 310.3101 | 5.97           | $1.15 \times 10^{-18}$ | $3.93 \times 10^{-18}$ | -1.5769 | 1.0344 |



|                                       |        |          |        |                        |                        |         |        |
|---------------------------------------|--------|----------|--------|------------------------|------------------------|---------|--------|
| Lucidenic acid A                      | 4.8555 | 497.2351 | 13.97  | $6.36 \times 10^{-19}$ | $2.26 \times 10^{-18}$ | 2.3894  | 1.2931 |
| Hypoglycin B                          | 5.2024 | 541.2619 | 24.80  | $3.47 \times 10^{-19}$ | $1.31 \times 10^{-18}$ | 2.4610  | 1.2619 |
| 1,28-Octacosanediol diferulate        | 6.3904 | 401.7641 | -14.89 | $2.77 \times 10^{-19}$ | $1.08 \times 10^{-18}$ | 2.6515  | 1.0372 |
| Arachidic acid                        | 4.4395 | 332.3389 | 6.94   | $1.77 \times 10^{-19}$ | $7.12 \times 10^{-19}$ | -1.6119 | 1.0941 |
| Normetanephrine                       | 4.0742 | 184.0977 | 5.19   | $1.67 \times 10^{-19}$ | $6.77 \times 10^{-19}$ | -2.8846 | 1.2534 |
| Opiorphin                             | 6.2559 | 710.417  | 17.16  | $1.58 \times 10^{-19}$ | $6.46 \times 10^{-19}$ | 2.9139  | 1.2039 |
| PG(36:1)                              | 7.7177 | 800.5676 | 18.28  | $7.47 \times 10^{-20}$ | $3.27 \times 10^{-19}$ | -3.9998 | 1.6180 |
| Tetradecanal                          | 3.2267 | 231.2506 | 8.82   | $6.64 \times 10^{-20}$ | $2.96 \times 10^{-19}$ | -1.8185 | 1.1799 |
| LPC(18:2)                             | 5.1949 | 521.3356 | -13.08 | $5.91 \times 10^{-20}$ | $2.67 \times 10^{-19}$ | 2.8174  | 1.3272 |
| Cynarasaponin F                       | 6.4343 | 798.4699 | 7.74   | $5.91 \times 10^{-20}$ | $2.67 \times 10^{-19}$ | 2.8149  | 1.1725 |
| [6]-Dehydrogingerdione                | 6.6439 | 308.1856 | -4.05  | $3.69 \times 10^{-20}$ | $1.72 \times 10^{-19}$ | -2.8805 | 1.0336 |
| 3-trans-p-Coumaroylrotundic acid      | 6.0411 | 652.4109 | -11.75 | $2.58 \times 10^{-20}$ | $1.22 \times 10^{-19}$ | 3.2086  | 1.1423 |
| Stearic acid                          | 3.8492 | 303.3076 | 4.01   | $2.29 \times 10^{-20}$ | $1.10 \times 10^{-19}$ | -2.0975 | 1.1505 |
| Aspartyl-Glycine                      | 4.5817 | 208.0968 | 21.15  | $1.91 \times 10^{-20}$ | $9.33 \times 10^{-20}$ | -1.8588 | 1.0535 |
| 9,12,13-TriHOME                       | 4.9037 | 313.234  | -2.97  | $1.69 \times 10^{-20}$ | $8.41 \times 10^{-20}$ | -1.7072 | 1.1424 |
| PE(40:10)                             | 6.3919 | 392.7493 | -2.54  | $1.04 \times 10^{-20}$ | $5.28 \times 10^{-20}$ | 2.6696  | 1.0748 |
| N-Methylnicotinium                    | 3.2103 | 216.1033 | 6.94   | $4.05 \times 10^{-21}$ | $2.24 \times 10^{-20}$ | -2.7077 | 1.2857 |
| Muzanzagenin                          | 6.2002 | 460.3105 | 15.30  | $2.77 \times 10^{-21}$ | $1.59 \times 10^{-20}$ | 4.1416  | 1.5427 |
| PI(34:1)                              | 6.4964 | 430.7669 | -10.99 | $1.45 \times 10^{-21}$ | $9.00 \times 10^{-21}$ | 2.8262  | 1.1002 |
| Ilicifolioside A                      | 3.1704 | 267.1252 | -3.45  | $6.55 \times 10^{-22}$ | $4.19 \times 10^{-21}$ | -1.7629 | 1.0448 |
| Lc3Cer                                | 6.5641 | 886.5224 | 11.68  | $2.53 \times 10^{-22}$ | $1.68 \times 10^{-21}$ | 2.7175  | 1.1140 |
| 1-(2,4,12-Octadecatrienoyl)piperidine | 3.2758 | 363.329  | 5.47   | $7.16 \times 10^{-23}$ | $5.17 \times 10^{-22}$ | -2.7274 | 1.2971 |
| Hebevinoside V                        | 8.389  | 873.5137 | 10.86  | $4.32 \times 10^{-23}$ | $3.25 \times 10^{-22}$ | -2.5001 | 1.1237 |
| 2,6 Dimethylheptanoyl carnitine       | 7.141  | 304.2383 | 1.15   | $1.92 \times 10^{-23}$ | $1.54 \times 10^{-22}$ | -1.8644 | 1.0335 |
| PG(38:7)                              | 6.4325 | 408.7538 | 18.20  | $7.18 \times 10^{-24}$ | $6.25 \times 10^{-23}$ | 2.6048  | 1.1007 |
| PS(46:1)                              | 5.7625 | 477.3462 | -0.77  | $1.19 \times 10^{-25}$ | $1.97 \times 10^{-24}$ | -5.9980 | 1.8726 |
| DAG(37:6)                             | 5.917  | 645.497  | -27.10 | $8.25 \times 10^{-27}$ | $3.13 \times 10^{-25}$ | -5.9339 | 1.8622 |
| DAG(44:11)                            | 5.8551 | 733.5469 | 7.15   | $2.29 \times 10^{-27}$ | $1.69 \times 10^{-25}$ | -7.1633 | 1.9705 |

---

**Benign vs. Malignant (borderline +malignant)**

|                                                         |        |          |       |        |        |         |        |
|---------------------------------------------------------|--------|----------|-------|--------|--------|---------|--------|
| Alanyl-Leucine                                          | 0.5998 | 185.1266 | -9.82 | 0.0299 | 0.3310 | 0.4742  | 1.0870 |
| Malonyl carnitine                                       | 3.0338 | 230.1032 | 6.51  | 0.0001 | 0.1225 | -0.4799 | 2.2927 |
| 5-Methoxytryptophan                                     | 3.1524 | 217.098  | 5.90  | 0.0141 | 0.3023 | 0.5266  | 2.0353 |
| Tetradecanal                                            | 3.2267 | 231.2506 | 8.82  | 0.0072 | 0.2724 | 0.1111  | 1.3363 |
| (Z)-3-Dodecene                                          | 3.2438 | 186.2208 | 0.81  | 0.0459 | 0.3749 | 0.7191  | 1.2834 |
| 1-(2,4,12-Octadecatrienoyl)piperidine                   | 3.2758 | 363.329  | 5.47  | 0.0214 | 0.3194 | 0.6933  | 1.5567 |
| Cyclocalamin                                            | 3.3263 | 521.2631 | 12.87 | 0.0064 | 0.2724 | -0.5958 | 2.8949 |
| Stearic acid                                            | 3.8492 | 303.3076 | 4.01  | 0.0230 | 0.3272 | 0.7080  | 1.4202 |
| Brassica napus non-fluorescent chlorophyll catabolite 3 | 4.1932 | 614.2705 | 4.02  | 0.0132 | 0.3023 | -0.3264 | 2.5323 |
| Dihydrolipoamide                                        | 4.2231 | 438.1456 | 5.81  | 0.0275 | 0.3310 | -0.2948 | 1.8247 |
| Arachidic acid                                          | 4.4395 | 332.3389 | 6.94  | 0.0155 | 0.3023 | 0.4871  | 1.3481 |
| 3-Hydroxyoctanoic acid                                  | 4.5635 | 183.1014 | 15.66 | 0.0132 | 0.3023 | -0.7618 | 2.4363 |
| HMDB0129843                                             | 4.6171 | 688.2496 | 10.22 | 0.0066 | 0.2724 | -0.3126 | 2.3146 |
| N-Acetylaspartylglutamic acid                           | 4.623  | 327.0775 | -6.03 | 0.0360 | 0.3583 | 0.6257  | 1.2934 |
| Ginsenyne C                                             | 4.9177 | 277.1789 | 1.26  | 0.0375 | 0.3583 | 0.5074  | 1.1694 |
| Behenic acid                                            | 4.9745 | 358.3667 | 0.59  | 0.0375 | 0.3583 | 0.6200  | 1.6773 |
| Cerebronic acid                                         | 4.9888 | 402.3927 | 0.25  | 0.0326 | 0.3441 | 1.0007  | 2.0765 |
| Thromboxane                                             | 5.0003 | 316.3472 | 0.95  | 0.0255 | 0.3310 | 0.4727  | 1.3378 |
| DAG(18:0)                                               | 5.2985 | 395.2757 | 1.83  | 0.0126 | 0.3023 | 0.6129  | 1.2636 |
| PE(36:4)                                                | 5.5261 | 722.5014 | -8.56 | 0.0170 | 0.3023 | 0.7197  | 1.4490 |

|                                                        |        |          |        |        |        |         |        |
|--------------------------------------------------------|--------|----------|--------|--------|--------|---------|--------|
| Nonoxynol-9                                            | 5.5593 | 635.4548 | 1.94   | 0.0162 | 0.3023 | 0.5529  | 1.3716 |
| Tangeraxanthin                                         | 5.6027 | 502.3711 | 13.44  | 0.0424 | 0.3614 | 0.5039  | 1.2433 |
| 3-(5,6,6-Trimethylbicyclo[2.2.1]hept-1-yl)cyclohexanol | 5.6605 | 254.247  | 9.38   | 0.0192 | 0.3194 | 0.2245  | 1.0088 |
| Adrenoyl ethanolamide                                  | 5.8872 | 376.3178 | -5.57  | 0.0062 | 0.2724 | 0.4580  | 1.3109 |
| Arbutin                                                | 5.8908 | 273.0963 | 1.67   | 0.0401 | 0.3583 | 0.7053  | 1.4460 |
| Acetyl tributyl citrate                                | 5.903  | 425.2143 | -0.56  | 0.0153 | 0.3023 | 0.6616  | 1.4220 |
| 1-docosene                                             | 5.9144 | 329.3851 | -0.04  | 0.0418 | 0.3611 | 0.5375  | 1.6100 |
| 13'-Carboxy-gamma-tocopherol                           | 6.0073 | 429.317  | -22.08 | 0.0385 | 0.3583 | 0.5304  | 1.2075 |
| Polyethylene, oxidized                                 | 6.3653 | 227.1279 | 5.17   | 0.0137 | 0.3023 | -0.5080 | 2.1763 |
| Azaspiracid 4                                          | 6.4618 | 433.7405 | 5.58   | 0.0271 | 0.3310 | 0.6277  | 1.4438 |
| Palmitic amide                                         | 6.491  | 256.2634 | 8.40   | 0.0211 | 0.3194 | 0.3673  | 1.4720 |
| Ecgonine methyl ester                                  | 6.5117 | 200.1279 | 0.46   | 0.0385 | 0.3583 | -0.3748 | 1.8902 |
| (±)-(Z)-2-(5-Tetradecenyl)cyclobutanone                | 6.816  | 282.2789 | 7.55   | 0.0380 | 0.3583 | 0.1746  | 1.2628 |
| 18-Hydroxycortisol                                     | 6.8204 | 396.2372 | -0.73  | 0.0097 | 0.2918 | -0.5221 | 1.8771 |
| MG(18:3)                                               | 6.9487 | 353.2662 | -5.09  | 0.0478 | 0.3809 | 0.5997  | 1.2193 |
| Capryloylglycine                                       | 6.9494 | 202.1437 | -1.03  | 0.0122 | 0.3023 | -0.4321 | 1.8646 |
| 2-trans,4-cis-Decadienoyl carnitine                    | 7.0777 | 312.2162 | -0.15  | 0.0139 | 0.3023 | -0.2665 | 1.6030 |
| (ent-16alpha)-16-Kauranol                              | 7.0928 | 308.2937 | 0.06   | 0.0227 | 0.3272 | 0.5592  | 1.2880 |
| Pubescenol                                             | 7.1438 | 475.2956 | -10.33 | 0.0271 | 0.3310 | 0.5709  | 1.3206 |
| Cerulenin                                              | 7.2691 | 224.1282 | 6.21   | 0.0207 | 0.3194 | -0.6254 | 2.3408 |
| 3-Oxocholic acid                                       | 7.281  | 407.2759 | 4.85   | 0.0092 | 0.2918 | 0.6372  | 1.4820 |
| Ursolic acid                                           | 7.3843 | 495.3321 | 14.06  | 0.0009 | 0.1470 | 0.6529  | 2.0814 |
| Homodihydrojasnone                                     | 7.553  | 181.1579 | 0.02   | 0.0175 | 0.3030 | 1.0793  | 1.9810 |
| PIP2(32:0)                                             | 7.5747 | 971.4684 | 4.20   | 0.0019 | 0.1916 | -0.7850 | 3.5149 |
| Androsterone glucuronide                               | 7.5776 | 485.2916 | -0.04  | 0.0018 | 0.1916 | -0.4911 | 2.4690 |
| 5a-Androst-3-en-17-one                                 | 7.5895 | 273.2212 | 3.23   | 0.0004 | 0.1225 | -0.7306 | 3.1692 |
| Pregnanediol-3-glucuronide                             | 7.7812 | 514.3371 | 2.81   | 0.0413 | 0.3611 | -1.1622 | 2.4896 |
| Geranylcitronellol                                     | 7.9792 | 310.3101 | 5.97   | 0.0067 | 0.2724 | 0.4903  | 1.6144 |
| MG(18:0)                                               | 8.2383 | 381.2975 | 6.90   | 0.0360 | 0.3583 | 0.6689  | 1.4341 |
| Farnesol                                               | 9.1546 | 240.2321 | 0.93   | 0.0283 | 0.3310 | 0.6425  | 1.3005 |
| Geranylacetone                                         | 9.1587 | 212.2008 | 6.52   | 0.0331 | 0.3462 | 0.5925  | 1.0961 |

---

**Borderline vs. Malignant**

|                              |        |          |        |        |        |         |        |
|------------------------------|--------|----------|--------|--------|--------|---------|--------|
| (E)-Casimiroedine            | 6.0093 | 436.2202 | -1.56  | 0.0008 | 0.6276 | -0.5977 | 2.1053 |
| Jasmonic acid                | 6.242  | 211.1319 | 6.06   | 0.0034 | 0.6276 | -0.7781 | 2.6184 |
| 9-cis-Retinoic acid          | 7.3522 | 323.1956 | -7.09  | 0.0085 | 0.6276 | -0.4697 | 1.6711 |
| Gibberellin A32              | 0.9482 | 397.1659 | -6.39  | 0.0095 | 0.6276 | -0.5518 | 1.6953 |
| Coniferyl alcohol            | 5.2862 | 181.0855 | 4.04   | 0.0123 | 0.6276 | -0.7280 | 2.2225 |
| 16a-Hydroxyestrone           | 5.0385 | 269.1495 | -13.21 | 0.0127 | 0.6276 | -0.7163 | 2.1758 |
| Cerulenin                    | 7.2691 | 224.1282 | 6.21   | 0.0132 | 0.6276 | -0.5413 | 1.6339 |
| Tricyclazole                 | 2.6366 | 190.0499 | -18.12 | 0.0236 | 0.6276 | -0.4948 | 1.9763 |
| Indoleacrylic acid           | 5.4391 | 171.0637 | 3.20   | 0.0286 | 0.6276 | -0.4444 | 1.5046 |
| Ganglioside GM3 (d18:1/16:0) | 6.7729 | 577.8698 | 4.06   | 0.0305 | 0.6276 | 0.9515  | 2.6159 |
| Myrigalone E                 | 7.301  | 343.1771 | 8.18   | 0.0414 | 0.6276 | 1.3192  | 1.1950 |
| Hebevinoside V               | 8.389  | 873.5137 | 10.86  | 0.0426 | 0.6276 | -0.5576 | 1.7093 |

---

Statistical analysis of differential urine metabolites from the comparison of normal control versus ovarian tumor, benign versus malignant, and borderline versus malignant. RT: Retention Time; *m/z*: Mass-to-Charge Ratio; Delta: the mass accuracy to the theoretical *m/z* and the detected ion; log<sub>2</sub>FC: log<sub>2</sub> Fold Change.

**Table S3.** Statistical analysis of differential plasma metabolites from three group of comparison.

| Metabolites                                               | RT<br>(min) | <i>m/z</i> | Delta<br>(ppm) | <i>P</i> -value        | FDR                    | log2FC  | VIP    |
|-----------------------------------------------------------|-------------|------------|----------------|------------------------|------------------------|---------|--------|
| <b>Normal vs. Ovarian tumor</b>                           |             |            |                |                        |                        |         |        |
| Histidiny-Glycine                                         | 0.7099      | 195.0885   | 4.35           | $2.08 \times 10^{-08}$ | $7.91 \times 10^{-07}$ | -1.4693 | 2.5525 |
| PA(33:1)                                                  | 5.5356      | 684.44     | -17.27         | $3.27 \times 10^{-14}$ | $2.13 \times 10^{-11}$ | -0.9565 | 2.5937 |
| PE(20:3/16:1)                                             | 5.5344      | 723.5061   | -11.14         | $4.79 \times 10^{-13}$ | $1.56 \times 10^{-10}$ | -1.7480 | 3.3841 |
| Tangeraxanthin                                            | 5.5988      | 507.3342   | 11.93          | $1.03 \times 10^{-10}$ | $1.04 \times 10^{-08}$ | -0.8504 | 2.2365 |
| Palmitoleoyl Ethanolamide                                 | 5.0875      | 320.257    | 23.60          | $1.41 \times 10^{-10}$ | $1.31 \times 10^{-08}$ | 2.0779  | 3.7986 |
| Crassostrea Secocarotenoid                                | 5.5343      | 634.4538   | 10.49          | $1.54 \times 10^{-10}$ | $1.34 \times 10^{-08}$ | -0.8483 | 2.1377 |
| 3'-N-Acetyl-4'-O-(14-methylpentadecanoyl)fusarochromanone | 5.5666      | 590.4271   | 16.70          | $1.69 \times 10^{-10}$ | $1.38 \times 10^{-08}$ | -0.7007 | 1.9424 |
| Palmitic acid                                             | 3.2026      | 275.2771   | -0.81          | $5.28 \times 10^{-10}$ | $3.43 \times 10^{-08}$ | -0.8149 | 1.8854 |
| Tetradec-2-enal                                           | 5.3095      | 228.2328   | 1.06           | $1.26 \times 10^{-09}$ | $7.11 \times 10^{-08}$ | 3.3895  | 4.7025 |
| PE(36:4)                                                  | 5.5344      | 722.5017   | -9.23          | $1.81 \times 10^{-09}$ | $9.34 \times 10^{-08}$ | -1.7952 | 2.9346 |
| Pentadecanol                                              | 6.8699      | 270.275    | 1.46           | $1.81 \times 10^{-09}$ | $9.34 \times 10^{-08}$ | 2.9234  | 4.0249 |
| 5,10-Pentadecadien-1-ol                                   | 5.7435      | 242.2488   | 2.14           | $9.80 \times 10^{-09}$ | $4.40 \times 10^{-07}$ | 3.2795  | 4.5598 |
| PE(36:2)                                                  | 5.5022      | 766.5302   | -4.69          | $2.19 \times 10^{-08}$ | $7.91 \times 10^{-07}$ | -2.1049 | 3.3225 |
| PA(30:2)                                                  | 5.5666      | 639.4106   | 13.29          | $2.25 \times 10^{-08}$ | $7.91 \times 10^{-07}$ | -0.6187 | 1.8122 |
| 3-hydroxydecanoyl carnitine                               | 6.9701      | 332.2427   | 0.04           | $2.03 \times 10^{-08}$ | $7.91 \times 10^{-07}$ | -0.8777 | 2.3170 |
| PE(34:1)                                                  | 9.4424      | 725.0521   | 7.30           | $4.12 \times 10^{-08}$ | $1.41 \times 10^{-06}$ | 3.8928  | 3.4679 |
| Nonoxynol-9                                               | 5.5362      | 617.4242   | -0.43          | $7.26 \times 10^{-08}$ | $2.10 \times 10^{-06}$ | -0.5282 | 1.7829 |
| Asiaticoside B                                            | 5.5062      | 508.233    | -14.16         | $2.12 \times 10^{-07}$ | $5.31 \times 10^{-06}$ | 0.8169  | 3.0373 |
| Oleamide                                                  | 6.7295      | 304.2608   | 10.07          | $3.21 \times 10^{-07}$ | $7.46 \times 10^{-06}$ | 1.4108  | 2.7749 |
| Methoxamine                                               | 0.8522      | 229.1543   | 0.77           | $3.52 \times 10^{-07}$ | $7.89 \times 10^{-06}$ | 0.5152  | 1.4005 |
| Palmitic amide                                            | 6.4351      | 256.263    | 8.45           | $4.83 \times 10^{-07}$ | $1.03 \times 10^{-05}$ | 1.6095  | 2.8217 |
| Sphinganine                                               | 7.7069      | 285.2913   | 0.55           | $7.36 \times 10^{-07}$ | $1.43 \times 10^{-05}$ | 1.0774  | 2.5351 |
| L-Octanoyl carnitine                                      | 6.6159      | 288.2161   | 1.64           | $8.58 \times 10^{-07}$ | $1.60 \times 10^{-05}$ | -0.6758 | 2.1990 |
| (R)-Carvotanacetone                                       | 6.7406      | 170.1543   | 0.63           | $1.24 \times 10^{-06}$ | $2.24 \times 10^{-05}$ | 1.3702  | 2.4099 |
| Methylisopelletierine                                     | 6.7406      | 156.1383   | -0.35          | $1.98 \times 10^{-06}$ | $3.44 \times 10^{-05}$ | 1.0802  | 2.0901 |
| Tanacetol B                                               | 7.3407      | 314.2328   | 0.12           | $2.02 \times 10^{-06}$ | $3.46 \times 10^{-05}$ | -0.6552 | 1.8114 |
| Hericene B                                                | 5.9364      | 600.4671   | 11.00          | $4.70 \times 10^{-06}$ | $7.28 \times 10^{-05}$ | -0.0784 | 1.3611 |
| 3-Methyl-2-cyclohexen-1-one                               | 6.7399      | 128.1071   | -0.15          | $5.30 \times 10^{-06}$ | $7.93 \times 10^{-05}$ | 0.8093  | 1.7352 |
| Glycocholic acid                                          | 7.5224      | 252.6351   | -18.74         | $7.28 \times 10^{-06}$ | 0.0001                 | 0.3278  | 2.1794 |
| L-Phenylalanine                                           | 6.7759      | 166.0867   | 1.53           | $2.16 \times 10^{-05}$ | 0.0003                 | 0.5274  | 1.5813 |
| Uridine triphosphate                                      | 0.8545      | 501.9937   | 2.49           | $3.18 \times 10^{-05}$ | 0.0004                 | 1.4136  | 1.9944 |
| Decyl alcohol                                             | 4.3663      | 200.2028   | 0.82           | $3.67 \times 10^{-05}$ | 0.0005                 | 1.0245  | 1.6975 |
| Vitamin A2 aldehyde                                       | 4.2155      | 285.2079   | -15.17         | $4.09 \times 10^{-05}$ | 0.0005                 | 0.3255  | 1.1528 |
| 2-(5,8-Tetradecadienyl)cyclobutanone                      | 6.9658      | 263.2377   | 24.45          | $6.13 \times 10^{-05}$ | 0.0007                 | -0.4655 | 1.5205 |
| 3-hydroxydodecanoyl carnitine                             | 7.9206      | 342.2634   | -0.22          | $7.54 \times 10^{-05}$ | 0.0009                 | -0.4789 | 1.6009 |
| 6,10,14-Trimethyl-5,9,13-pentadecatrien-2-one             | 6.976       | 245.2256   | 0.36           | $7.68 \times 10^{-05}$ | 0.0009                 | -0.4335 | 1.3912 |
| Austalide L                                               | 4.8102      | 447.0557   | 13.77          | 0.0001                 | 0.0011                 | -0.5927 | 1.5482 |
| 8,11,14-Eicosatrienoic acid                               | 7.3424      | 307.264    | -1.50          | 0.0002                 | 0.0016                 | -0.4181 | 1.2458 |
| 6-Hydroxyoctadecanoic acid                                | 3.2348      | 318.2997   | -1.10          | 0.0002                 | 0.0019                 | -0.3866 | 1.1473 |
| Dodecanoic acid                                           | 6.3903      | 218.2114   | 7.55           | 0.0002                 | 0.0022                 | -0.4288 | 1.3916 |
| 3-(L-Menthoxy)-2-methylpropane-1,2-diol                   | 6.5658      | 262.2373   | -1.42          | 0.0003                 | 0.0026                 | 0.2195  | 1.1396 |
| N-Acetyl aminooctanoic acid                               | 5.5042      | 184.1327   | -0.26          | 0.0003                 | 0.0027                 | 0.5370  | 2.3786 |
| 5-O-phosphonato-alpha-D-ribofuranosyl Diphosphate(5-)     | 0.802       | 372.9602   | 26.49          | 0.0004                 | 0.0033                 | 0.9782  | 2.2707 |
| Enterodiol                                                | 5.8883      | 347.1248   | 2.22           | 0.0004                 | 0.0035                 | -0.7270 | 2.7618 |

|                                         |        |          |       |        |        |         |        |
|-----------------------------------------|--------|----------|-------|--------|--------|---------|--------|
| 2-trans,4-cis-Decadienoyl carnitine     | 7.0519 | 312.2159 | 0.45  | 0.0004 | 0.0036 | -0.4324 | 1.2384 |
| Phaseolic acid                          | 0.7259 | 245.1358 | -8.60 | 0.0004 | 0.0037 | 0.4169  | 1.1192 |
| 2-Hydroxybenzaldehyde                   | 2.9482 | 105.0336 | -0.64 | 0.0005 | 0.0039 | -1.0698 | 1.8632 |
| 6-Hydroxyhexadecanoic acid              | 3.2348 | 290.2677 | 21.02 | 0.0009 | 0.0069 | -1.2459 | 1.4892 |
| (±)-(Z)-2-(5-Tetradecenyl)cyclobutanone | 7.8162 | 265.2535 | 0.49  | 0.0011 | 0.0084 | -0.3909 | 1.5146 |
| Elaidic acid                            | 6.7435 | 283.2656 | 1.08  | 0.0023 | 0.0153 | 1.3132  | 1.7879 |
| L-Carnitine                             | 0.7272 | 162.1121 | -0.38 | 0.0026 | 0.0169 | 0.3008  | 1.0947 |
| Phenylacetyl glutamine                  | 4.9737 | 247.108  | 3.51  | 0.0029 | 0.0187 | 0.3016  | 1.0205 |
| alpha-Terpineol formate                 | 0.8064 | 200.1619 | 1.68  | 0.0035 | 0.0220 | -6.4035 | 3.9481 |
| Tetrahydroharmol                        | 3.1067 | 204.124  | 17.37 | 0.0040 | 0.0244 | -6.4909 | 4.3331 |
| Neodiospyrin                            | 2.9439 | 397.071  | 6.53  | 0.0064 | 0.0357 | -1.2587 | 1.8134 |
| alpha-Terpineol propanoate              | 2.9775 | 229.199  | 7.56  | 0.0195 | 0.0886 | -0.4971 | 1.1261 |

#### Benign vs. Malignant (borderline+malignant)

|                                                       |          |          |        |        |        |         |        |
|-------------------------------------------------------|----------|----------|--------|--------|--------|---------|--------|
| 5-O-phosphonato-alpha-D-ribofuranosyl Diphosphate(5-) | 372.9602 | 372.9602 | 26.49  | 0.0227 | 0.3283 | -0.3985 | 3.0308 |
| Uridine triphosphate                                  | 501.9937 | 501.9937 | 2.49   | 0.0340 | 0.3486 | -0.4253 | 3.1175 |
| 5'-O-Methylmelledonal                                 | 485.158  | 485.158  | 3.19   | 0.0248 | 0.3291 | -0.3308 | 1.4676 |
| Tryptophyl-Tyrosine                                   | 409.1868 | 409.1868 | 0.15   | 0.0146 | 0.2873 | -0.2541 | 2.0151 |
| L-Tryptophan                                          | 206.1005 | 206.1005 | 0.01   | 0.0244 | 0.3291 | -0.2160 | 1.9539 |
| 3-Oxodecanoic acid                                    | 209.1176 | 209.1176 | 12.75  | 0.0021 | 0.1812 | -0.4134 | 2.0723 |
| 3,4-Dihydroxymandelic acid                            | 185.0443 | 185.0443 | 0.29   | 0.0360 | 0.3513 | -0.5068 | 1.5459 |
| 2-Arachidonylglycerol                                 | 396.3084 | 396.3084 | 1.04   | 0.0317 | 0.3458 | 0.6066  | 1.1086 |
| Lucidenic acid A                                      | 476.306  | 476.306  | 12.25  | 0.0139 | 0.2868 | 1.1363  | 1.4422 |
| 3,7-Dihydroxy-25-methoxycucurbita-5,23-dien-19-al     | 528.406  | 528.406  | 10.75  | 0.0007 | 0.1812 | 0.3942  | 1.1321 |
| PA(30:2)                                              | 639.4106 | 639.4106 | 13.29  | 0.0079 | 0.2623 | 0.4084  | 1.2376 |
| Okadaic acid                                          | 828.4469 | 828.4469 | -16.28 | 0.0010 | 0.1812 | 0.6162  | 2.5672 |
| 1,7-Dimethyl guanosine                                | 330.1642 | 330.1642 | 10.90  | 0.0041 | 0.2189 | 0.4236  | 1.8014 |
| Arbutin                                               | 273.0984 | 273.0984 | 1.66   | 0.0160 | 0.2982 | 0.3643  | 1.5403 |
| Estrone                                               | 271.1652 | 271.1652 | -14.00 | 0.0407 | 0.3604 | 0.4901  | 1.1105 |
| 2-trans,4-cis-Decadienoyl carnitine                   | 312.2159 | 312.2159 | 0.45   | 0.0126 | 0.2780 | 0.4928  | 1.1053 |
| Tanacetol B                                           | 314.2328 | 314.2328 | 0.12   | 0.0195 | 0.3037 | 0.6986  | 1.2132 |
| Alpha-Linolenic acid                                  | 292.2609 | 292.2609 | 1.77   | 0.0035 | 0.2178 | 0.1680  | 1.4742 |
| 3-hydroxydodecanoyl carnitine                         | 342.2634 | 342.2634 | -0.22  | 0.0287 | 0.3458 | 0.7715  | 1.0036 |

#### Borderline vs. Malignant

|                                                       |        |          |       |        |        |         |        |
|-------------------------------------------------------|--------|----------|-------|--------|--------|---------|--------|
| Rutacridone                                           | 2.3507 | 637.2364 | 5.31  | 0.0002 | 0.1191 | -0.5052 | 2.2425 |
| Methoxamine                                           | 0.8522 | 229.1543 | 0.77  | 0.0067 | 0.2195 | 0.2031  | 1.5321 |
| 8,11,14-Eicosatrienoic acid                           | 7.3424 | 307.264  | -1.50 | 0.0082 | 0.2419 | -0.5519 | 2.0917 |
| Phenylacetyl glutamine                                | 4.9737 | 247.108  | 3.51  | 0.0132 | 0.2912 | -0.4181 | 1.4345 |
| Sphinganine                                           | 7.7069 | 285.2913 | 0.55  | 0.0207 | 0.3636 | 0.6217  | 2.2933 |
| 5'-O-Methylmelledonal                                 | 1.5925 | 485.158  | 3.19  | 0.0378 | 0.4925 | -0.5424 | 1.5001 |
| Elaidic acid                                          | 6.7435 | 283.2656 | 1.08  | 0.0378 | 0.4925 | 1.3700  | 3.6240 |
| 5-O-phosphonato-alpha-D-ribofuranosyl Diphosphate(5-) | 0.802  | 372.9602 | 26.49 | 0.0390 | 0.4977 | 0.8051  | 2.9858 |
| Uridine triphosphate                                  | 0.8545 | 501.9937 | 2.49  | 0.0480 | 0.5478 | 0.6359  | 2.2719 |
| 2-Arachidonylglycerol                                 | 3.9906 | 396.3084 | 1.04  | 0.0494 | 0.5494 | -0.9633 | 1.5881 |

Statistical analysis of differential plasma metabolites from the comparison of normal control versus ovarian tumor, benign versus malignant, and borderline versus malignant. RT: Retention Time; *m/z*: Mass-to-Charge Ratio; Delta: the mass accuracy to the theoretical *m/z* and the detected ion; log<sub>2</sub>FC: log<sub>2</sub> Fold Change.

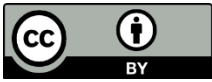

© 2020 by the authors. Licensee MDPI, Basel, Switzerland. This article is an open access article distributed under the terms and conditions of the Creative Commons Attribution (CC BY) license (<http://creativecommons.org/licenses/by/4.0/>).
